# Supplementary material
Source: PubMed Central journal article supplement (PMC6440721)
Supplement: jamaoncol-4-e183267-s002.pdf [file jamaoncol-4-e183267-s002.pdf]

## Supplementary Online Content

Nooka AK, Wang M, Yee AJ, et al. Assessment of safety and immunogenicity of PVX-410 vaccine with or without lenalidomide in patients with smoldering multiple myeloma: a nonrandomized clinical trial [published online August 16, 2018]. *JAMA Oncol*. doi:10.1001/jamaoncol.2018.3267

**eFigure 1.** Treatment Regimen Schematic

**eFigure 2.** Representative Patient CD3+CD8+T Cell Response

**eTable 1.** Most frequent reported treatment-emergent adverse events

**eTable 2.** Relationship of immune response to clinical response

This supplementary material has been provided by the authors to give readers additional information about their work.

**eFigure 1: Treatment Regimen Schematic**

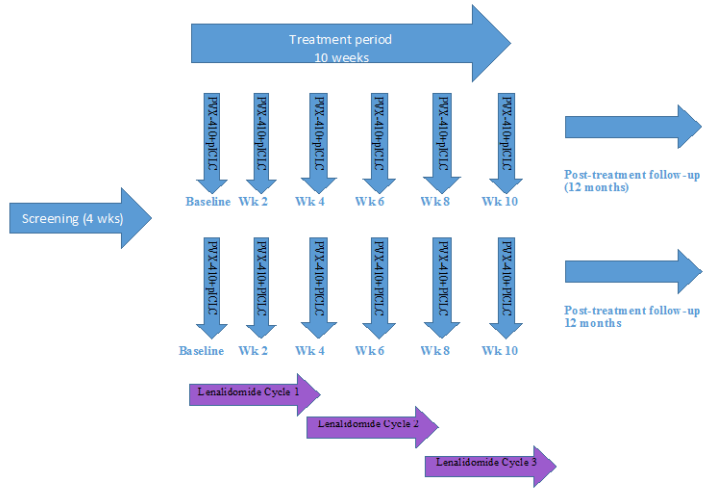

**eFigure 2. Representative Patient CD3<sup>+</sup>CD8<sup>+</sup>T Cell Response**

**A**

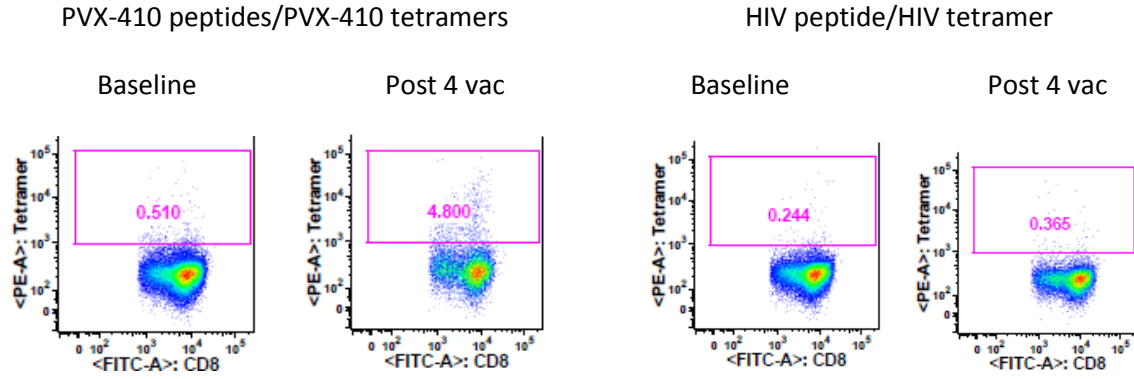

**B**

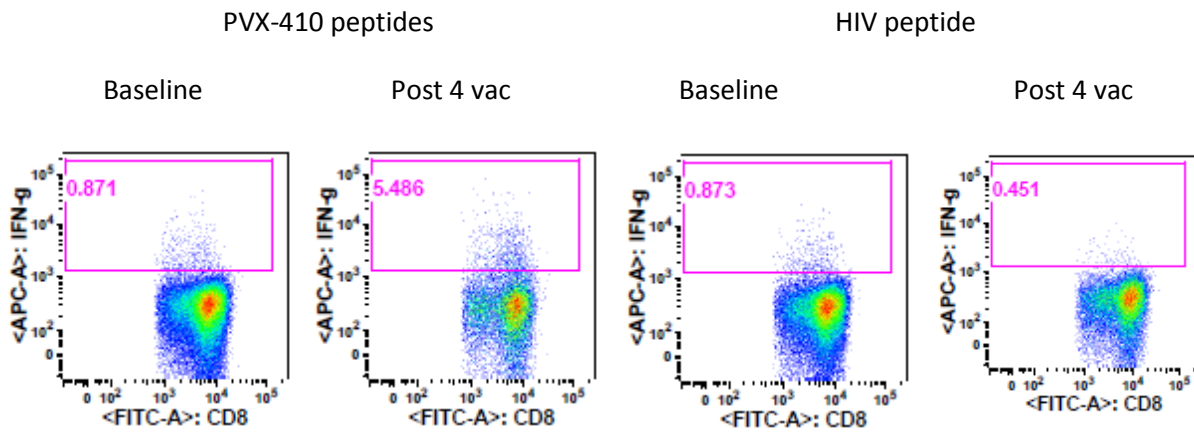

**eTable 1. Most frequent reported treatment-emergent adverse events**

| <b>Number of patients</b>             | <b>All PVX-410 only (N=12)</b> | <b>Low Dose 0.4 mg peptide PVX-410 Only (N=3)</b> | <b>Target Dose 0.8 mg peptide PVX-410 Only (N=9)</b> | <b>Target Dose 0.8 mg peptide PVX-410 + lenalidomide (N=10)</b> |
|---------------------------------------|--------------------------------|---------------------------------------------------|------------------------------------------------------|-----------------------------------------------------------------|
| All System organ classes              |                                |                                                   |                                                      |                                                                 |
| Total Subjects with at least one TEAE | 12 (100%)                      | 3 (100%)                                          | 9 (100%)                                             | 10 (100%)                                                       |
| Most frequently reported TEAEs        |                                |                                                   |                                                      |                                                                 |
| Injection site pain                   | 7 (58.3%)                      | 2 (66.7%)                                         | 5 (55.6%)                                            | 10 (100%)                                                       |
| Injection site swelling               | 1 (8.3%)                       | 0 (0.0%)                                          | 1 (11.1%)                                            | 9 (90.0%)                                                       |
| Injection site erythema               | 3 (25.0%)                      | 0 (0.0%)                                          | 3 (33.3%)                                            | 8 (80.0%)                                                       |
| Myalgia                               | 2 (16.7%)                      | 1 (33.3%)                                         | 1 (11.1%)                                            | 8 (80.0%)                                                       |
| Injection site pruritus               | 2 (16.7%)                      | 1 (33.3%)                                         | 1 (11.1%)                                            | 7 (70.0%)                                                       |
| Fatigue                               | 4 (33.3%)                      | 2 (66.7%)                                         | 2 (22.2%)                                            | 4 (40.0%)                                                       |
| Chills                                | 2 (16.7%)                      | 0 (0.0%)                                          | 2 (22.2%)                                            | 4 (40.0%)                                                       |
| Injection site irritation             | 2 (16.7%)                      | 0 (0.0%)                                          | 2 (22.2%)                                            | 4 (40.0%)                                                       |
| Headache                              | 2 (16.7%)                      | 1 (33.3%)                                         | 1 (11.1%)                                            | 4 (40.0%)                                                       |
| Pruritus                              | 1 (8.3%)                       | 1 (33.3%)                                         | 0 (0.0%)                                             | 4 (40.0%)                                                       |
| Cough                                 | 0 (0.0%)                       | 0 (0.0%)                                          | 0 (0.0%)                                             | 4 (40.0%)                                                       |
| Neutropenia                           | 0 (0.0%)                       | 0 (0.0%)                                          | 0 (0.0%)                                             | 4 (40.0%)                                                       |
| Hypokalaemia                          | 0 (0.0%)                       | 0 (0.0%)                                          | 0 (0.0%)                                             | 4 (40.0%)                                                       |
| Pyrexia                               | 3 (25.0%)                      | 1 (33.3%)                                         | 2 (22.2%)                                            | 3 (30.0%)                                                       |
| Injection site induration             | 2 (16.7%)                      | 1 (33.3%)                                         | 1 (11.1%)                                            | 3 (30.0%)                                                       |
| Injection site discomfort             | 2 (16.7%)                      | 0 (0.0%)                                          | 2 (22.2%)                                            | 3 (30.0%)                                                       |
| Nausea                                | 2 (16.7%)                      | 0 (0.0%)                                          | 2 (22.2%)                                            | 3 (30.0%)                                                       |
| Constipation                          | 0 (0.0%)                       | 0 (0.0%)                                          | 0 (0.0%)                                             | 3 (30.0%)                                                       |
| Upper respiratory tract infection     | 2 (16.7%)                      | 2 (66.7%)                                         | 0 (0.0%)                                             | 2 (20.0%)                                                       |
| Rash                                  | 2 (16.7%)                      | 1 (33.3%)                                         | 1 (11.1%)                                            | 2 (20.0%)                                                       |
| Pain                                  | 1 (8.3%)                       | 1 (33.3%)                                         | 0 (0.0%)                                             | 2 (20.0%)                                                       |
| Diarrhoea                             | 1 (8.3%)                       | 1 (33.3%)                                         | 0 (0.0%)                                             | 2 (20.0%)                                                       |
| Epistaxis                             | 1 (8.3%)                       | 1 (33.3%)                                         | 0 (0.0%)                                             | 2 (20.0%)                                                       |
| Injection site rash                   | 2 (16.7%)                      | 1 (33.3%)                                         | 1 (11.1%)                                            | 1 (10.0%)                                                       |

**eTable 2. Relationship of immune response to clinical response**

| <b>Progressors</b>                 |                                       |                |                |                |                |                |               |               |               |               |                |
|------------------------------------|---------------------------------------|----------------|----------------|----------------|----------------|----------------|---------------|---------------|---------------|---------------|----------------|
| <b>Fold Increase from Baseline</b> | <b>Timepoint</b>                      | <b>04-031*</b> | <b>04-028*</b> | <b>01-017*</b> | <b>04-006*</b> | <b>03-004*</b> | <b>03-063</b> |               |               |               |                |
| <b>Tetramer+ Cells</b>             | <b>Post 2 Vac</b>                     | 15.10          | 0.73           | NA             | 3.12           | 14.88          | 2.79          |               |               |               |                |
|                                    | <b>Post 4 Vac</b>                     | 12.27          | 4.20           | 4.02           | 5.07           | 2.16           | 2.67          |               |               |               |                |
|                                    | <b>Post 6 Vac (1 month follow up)</b> | 8.05           | 11.84          | 3.98           | 2.42           | 2.69           | 5.57          |               |               |               |                |
|                                    | <b>Post 6 Vac (3 month follow up)</b> | 5.01           | 2.61           | 6.09           | 1.41           | 2.97           | 1.76          |               |               |               |                |
| <b>IFN-gamma+ Cells</b>            | <b>Post 2 Vac</b>                     | 11.70          | 1.15           | NA             | 2.21           | 11.07          | 1.21          |               |               |               |                |
|                                    | <b>Post 4 Vac</b>                     | 11.78          | 7.10           | 1.39           | 0.94           | 2.91           | 1.00          |               |               |               |                |
|                                    | <b>Post 6 Vac (1 month follow up)</b> | 6.91           | 19.34          | 2.20           | 2.08           | 2.10           | 2.40          |               |               |               |                |
|                                    | <b>Post 6 Vac (3 month follow up)</b> | 5.62           | 6.84           | 3.66           | 0.95           | 2.27           | 1.25          |               |               |               |                |
| <b>Stable Disease</b>              |                                       |                |                |                |                |                |               |               |               |               |                |
| <b>Fold Increase from Baseline</b> | <b>Timepoint</b>                      | <b>01-034*</b> | <b>01-042*</b> | <b>03-013*</b> | <b>03-012*</b> | <b>01-018*</b> | <b>03-059</b> | <b>03-061</b> | <b>03-071</b> | <b>06-069</b> | <b>04-008*</b> |
| <b>Tetramer+ Cells</b>             | <b>Post 2 Vac</b>                     | 1.72           | 2.12           | 1.05           | 2.19           |                | 3.63          | 2.80          | 19.44         | 3.60          | 18.50          |
|                                    | <b>Post 4 Vac</b>                     | 2.93           | 10.21          | 0.69           | 59.57          | 22.26          | 9.41          | 6.42          | 16.87         | 42.48         | 30.20          |
|                                    | <b>Post 6 Vac (1 month follow up)</b> | 3.10           | 20.96          | 1.05           | NA             | 11.60          | 5.39          | 4.07          | 5.81          | 21.13         | 31.13          |
|                                    | <b>Post 6 Vac (3 month follow up)</b> | 3.25           | 13.58          | 0.78           | 34.25          | 6.29           | 5.71          | 2.75          | 8.56          | 38.95         | 22.85          |
| <b>IFN-gamma+ Cells</b>            | <b>Post 2 Vac</b>                     | 1.43           | 1.39           | 2.78           | 1.06           | NA             | 2.08          | 1.92          | 27.00         | 2.59          | 14.41          |
|                                    | <b>Post 4 Vac</b>                     | 2.30           | 2.63           | 1.87           | 35.15          | 5.77           | 6.30          | 2.07          | 32.89         | 25.37         | 21.96          |
|                                    | <b>Post 6 Vac (1 month follow up)</b> | 3.95           | 4.93           | 4.55           |                | 3.72           | 3.02          | 2.39          | 11.63         | 23.08         | 21.09          |
|                                    | <b>Post 6 Vac (3 month follow up)</b> | 4.11           | 3.23           | 6.82           | 25.76          | 2.52           | 3.75          | 0.99          | 11.56         | 30.56         | 16.91          |
| <b>Responders</b>                  |                                       |                |                |                |                |                |               |               |               |               |                |
| <b>Fold Increase from</b>          | <b>Timepoint</b>                      | <b>03-</b>     | <b>03-</b>     | <b>01-</b>     | <b>04-</b>     |                |               |               |               |               |                |

| <b>Baseline</b>         |                                       | <b>052</b> | <b>054</b> | <b>075</b> | <b>072</b> |  |  |  |  |  |  |
|-------------------------|---------------------------------------|------------|------------|------------|------------|--|--|--|--|--|--|
| <b>Tetramer+ Cells</b>  | <b>Post 2 Vac</b>                     | 46.80      | 9.51       | 26.96      | 115.50     |  |  |  |  |  |  |
|                         | <b>Post 4 Vac</b>                     | 17.10      | 21.17      | 32.32      | 95.43      |  |  |  |  |  |  |
|                         | <b>Post 6 Vac (1 month follow up)</b> | 9.37       | 12.16      | NA         | 19.42      |  |  |  |  |  |  |
|                         | <b>Post 6 Vac (3 month follow up)</b> | 4.95       | 5.15       | 13.71      | 15.85      |  |  |  |  |  |  |
| <b>IFN-gamma+ Cells</b> | <b>Post 2 Vac</b>                     | 27.59      | 23.41      | 15.66      | 34.12      |  |  |  |  |  |  |
|                         | <b>Post 4 Vac</b>                     | 11.38      | 41.24      | 16.42      | 30.37      |  |  |  |  |  |  |
|                         | <b>Post 6 Vac (1 month follow up)</b> | 8.69       | 19.42      | NA         | 9.09       |  |  |  |  |  |  |
|                         | <b>Post 6 Vac (3 month follow up)</b> | 6.67       | 9.66       | 9.09       | 7.13       |  |  |  |  |  |  |

\*PVX-410 alone (monotherapy)
